# Supplementary material
Source: Springer Nature journal article supplement (https://www.springermedizin.de/resource/supplementary/12943_2010_672_MOESM3_ESM.pdf/9554544)

A

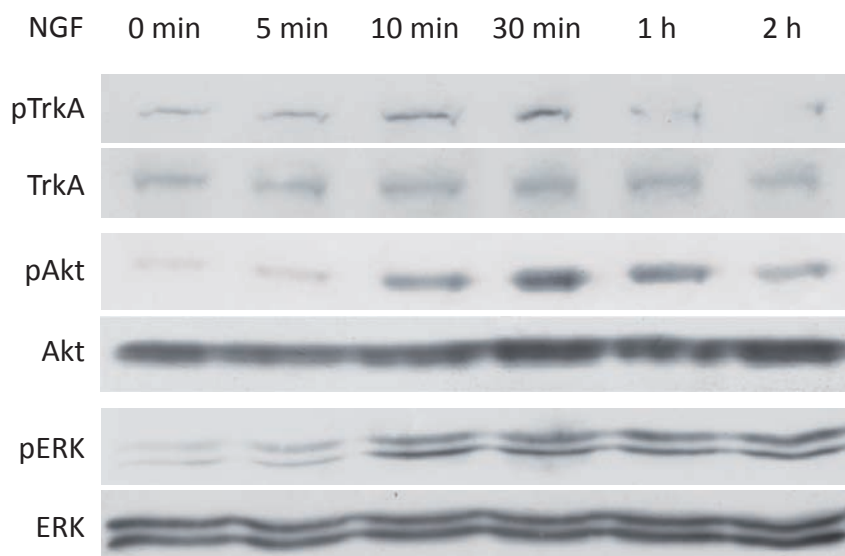

B

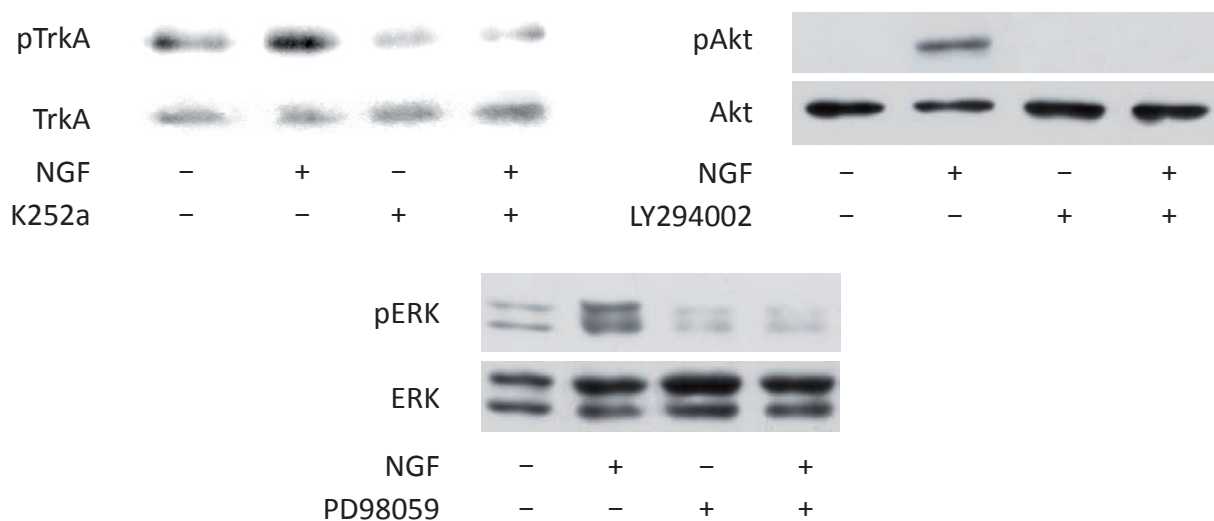

C

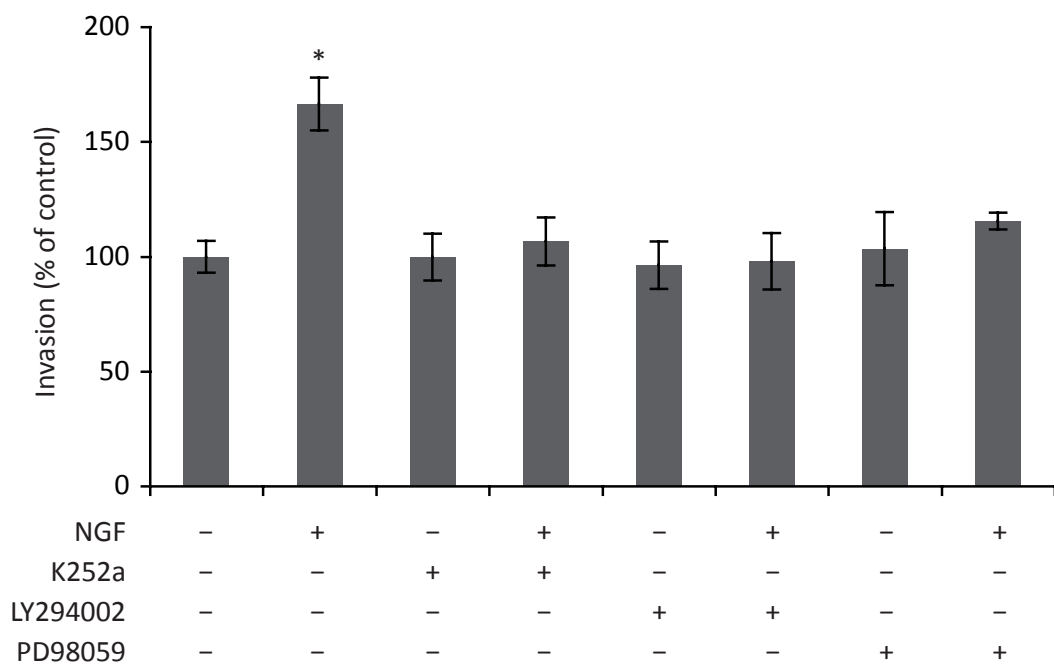

Supplement: MOESM3 [file 9554544]
